# Supplementary material for: Synthesis of niobium(iv) carbide nanoparticles via an alkali-molten-method at a spatially-limited surface of mesoporous carbon
Source: Royal Society of Chemistry journal article supplement (doi:10.1039/d3ra03254j), 2023-01-01
Supplement: d3ra03254j1.pdf [file d3ra03254j1.pdf]

## **Synthesis of Niobium(IV) Carbide Nanoparticles by Alkali-Molten-Method at Spatially-Limited Surface of Mesoporous Carbon**

Keigo Tashiro,<sup>\*a</sup> Shogo Kobayashi,<sup>a</sup> Hinako Inoue,<sup>a</sup> Akihide Yanagita,<sup>a</sup> Shuhei Shimoda,<sup>b</sup> and Shigeo Satokawa<sup>\*a</sup>

<sup>a</sup> *Graduate School of Science and Technology, Seikei University, 3-3-1 Kichijoji, Kitamachi, Musashino-shi, Tokyo, 180-8633, Japan.*

<sup>b</sup> *Institute for Catalysis, Hokkaido University, Kita 21 Nishi 10, Kita-ku, Sapporo-shi, Hokkaido, 001-0021, Japan.*

E-Mail (S. Satokawa) : [satokawa@st.seikei.ac.jp](mailto:satokawa@st.seikei.ac.jp)

E-mail (K. Tashiro): [keigo-tashiro@st.seikei.ac.jp](mailto:keigo-tashiro@st.seikei.ac.jp)

## Supporting results

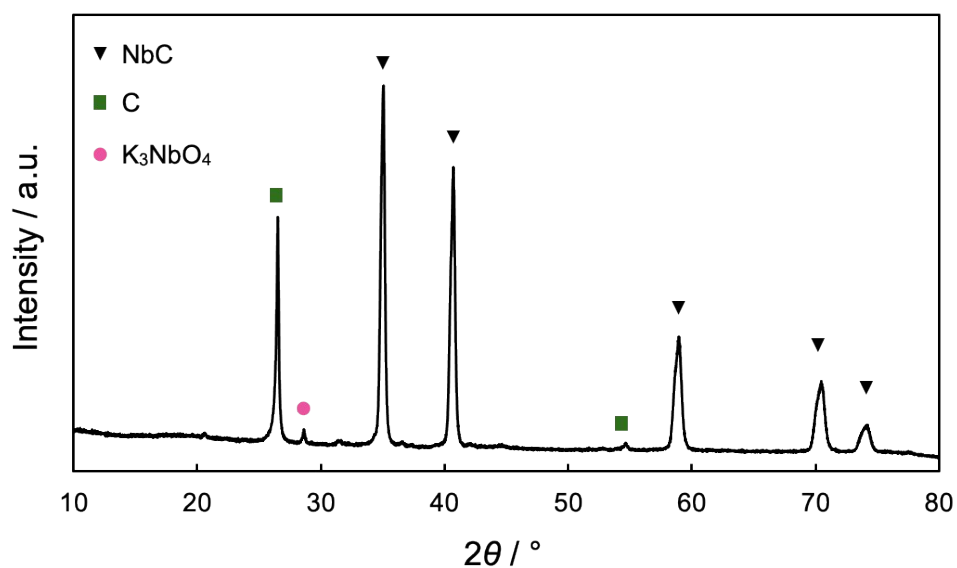

**Figure S1** XRD patterns of synthesized NbC by the calcination of the mixture of Nb<sub>2</sub>O<sub>5</sub> (0.1 g), graphite (0.1 g), and K<sub>2</sub>CO<sub>3</sub> (0.035 g) at 1150 °C for 10 h under N<sub>2</sub> stream. The yield of NbC was estimated to be 94.4% by RIR analysis.

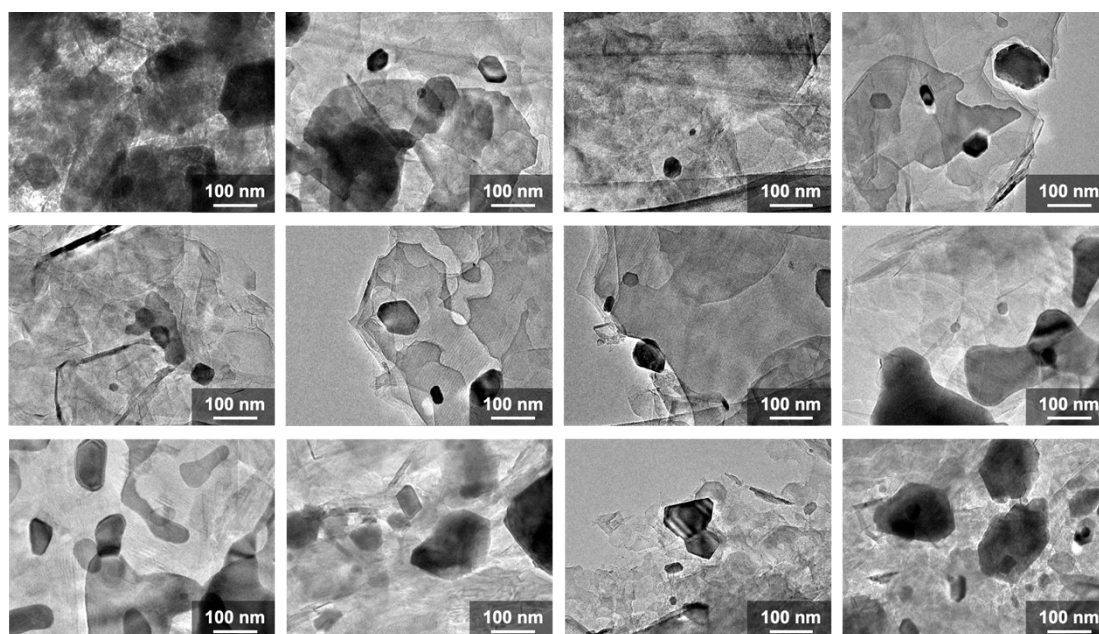

**Figure S2** TEM images of NbC nanoparticles synthesized by using graphite. The reactants (Nb<sub>2</sub>O<sub>5</sub>, K<sub>2</sub>CO<sub>3</sub>, and graphite) on the Pt boat were mixed and calcined at 1150 °C for 10 h under N<sub>2</sub> flow condition.

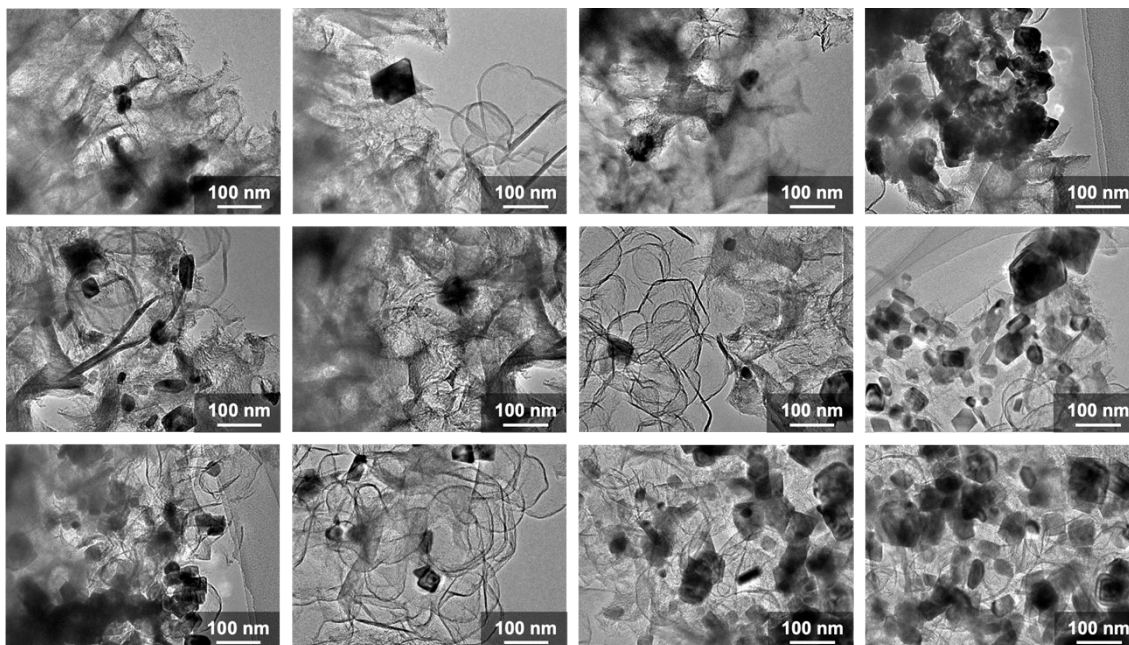

**Figure S3** TEM images of NbC nanoparticles synthesized by using MPC-150. The reactants ( $\text{Nb}_2\text{O}_5$ ,  $\text{K}_2\text{CO}_3$ , and MPC-150) on the Pt boat were mixed and calcined at  $1150\text{ }^\circ\text{C}$  for 10 h under  $\text{N}_2$  flow condition.

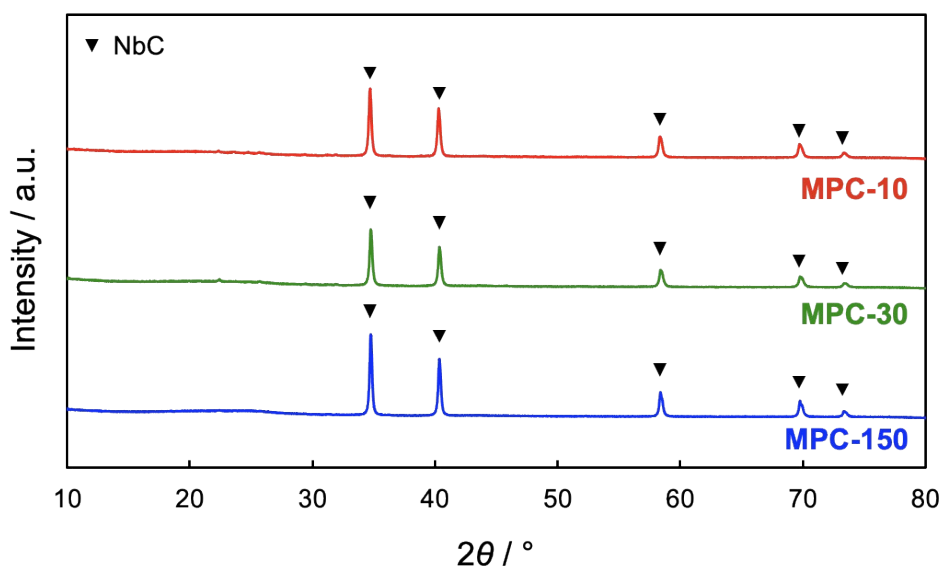

**Figure S4.** XRD patterns of NbC synthesized with MPC-150, MPC-30, and MPC-10, in which  $\text{Nb}_2\text{O}_5$  (0.1 g), MPC (0.1 g), and  $\text{K}_2\text{CO}_3$  (0.035 g) were calcined at  $1150\text{ }^\circ\text{C}$  for 10 h under  $\text{N}_2$  stream. The yields of NbC synthesized with all MPC were considered as 100% since no other peaks were observed.

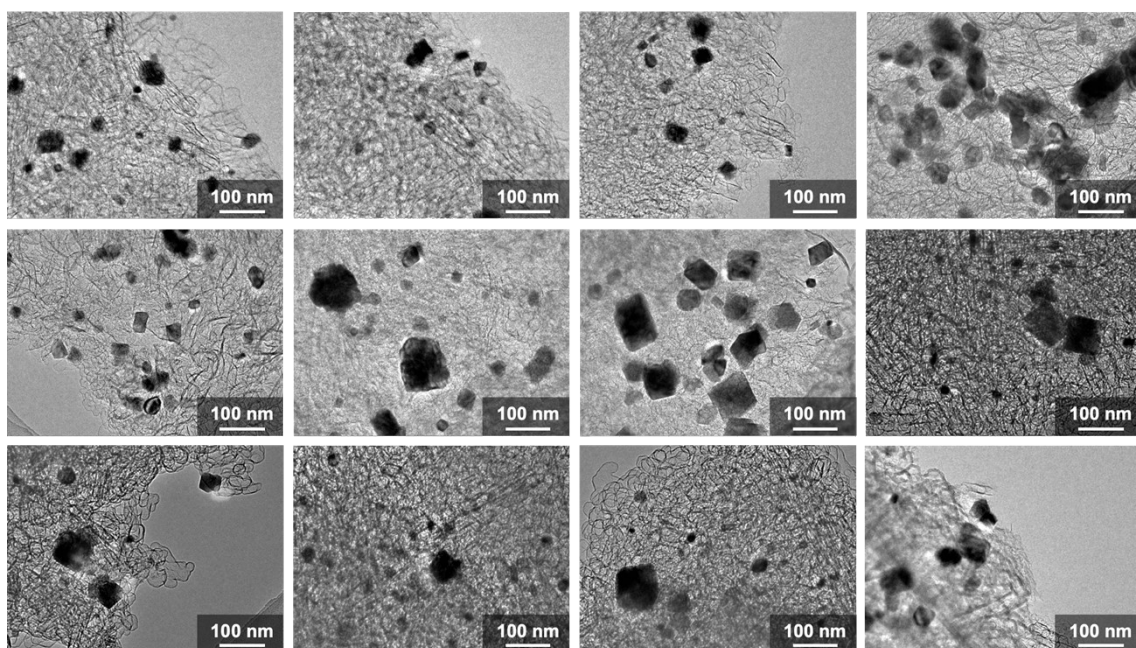

**Figure S5** TEM images of NbC nanoparticles synthesized by using MPC-30. The reactants ( $\text{Nb}_2\text{O}_5$ ,  $\text{K}_2\text{CO}_3$ , and MPC-30) on the Pt boat were mixed and calcined at 1150 °C for 10 h under  $\text{N}_2$  flow condition.

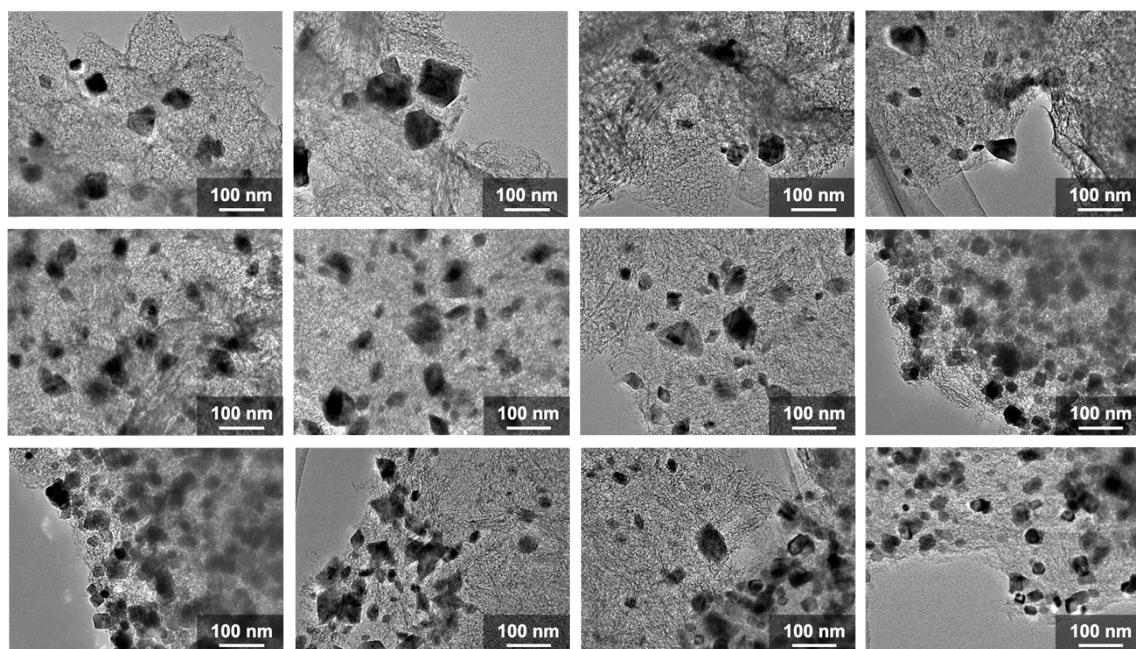

**Figure S6** TEM images of NbC nanoparticles synthesized by using MPC-10. The reactants ( $\text{Nb}_2\text{O}_5$ ,  $\text{K}_2\text{CO}_3$ , and MPC-10) on the Pt boat were mixed and calcined at 1150 °C for 10 h under  $\text{N}_2$  flow condition.

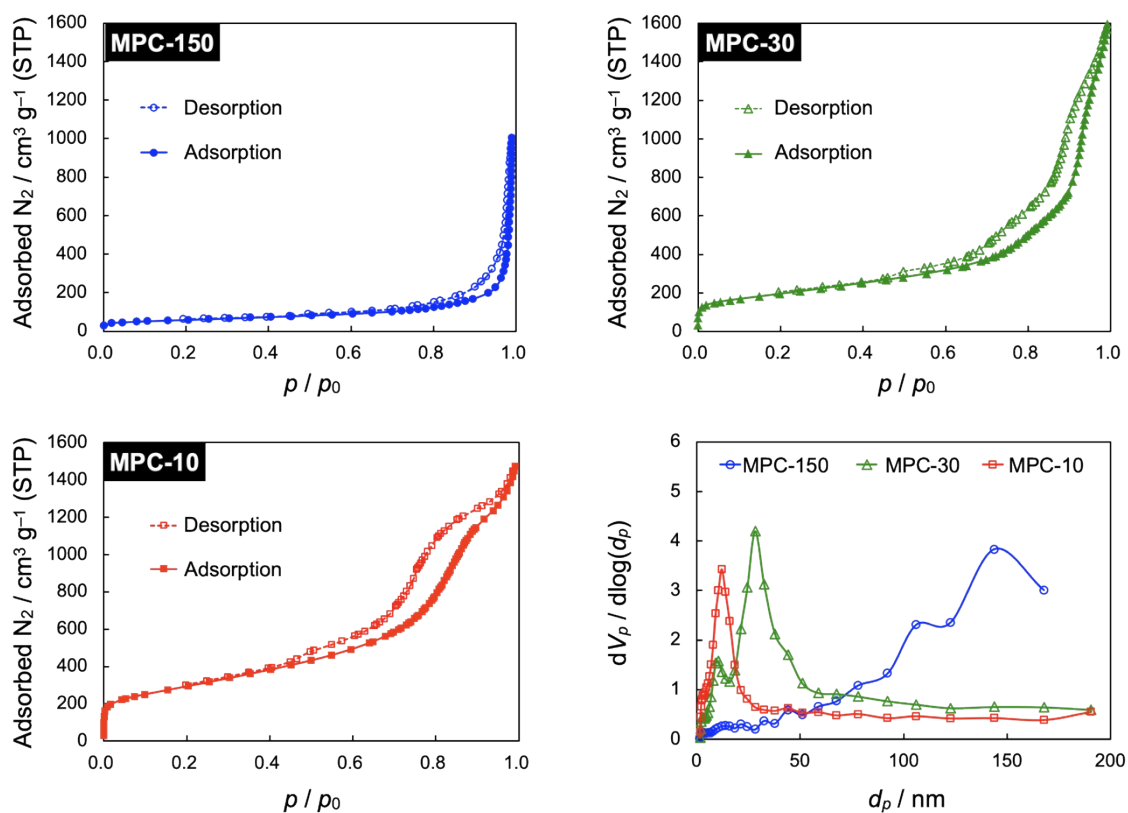

**Figure S7** N<sub>2</sub> adsorption/desorption isotherms of MPC-150, MPC-30, and MPC-10 and pore size distributions of each MPC estimated from Barrett-Joyner-Halenda (BJH) method.



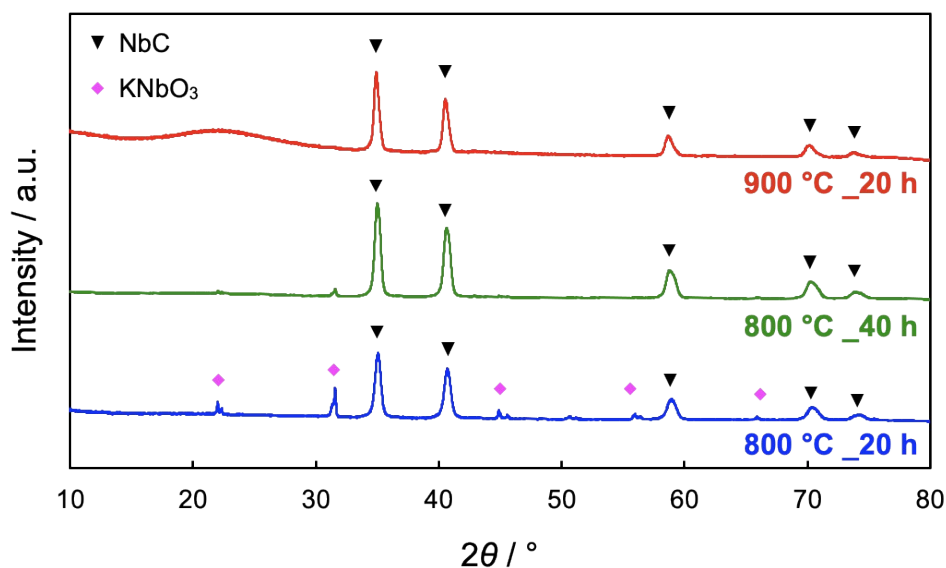

**Figure S8** XRD patterns of obtained NbC synthesized from the mixture of Nb<sub>2</sub>O<sub>5</sub> (0.1 g), MPC-150 (0.1 g), and K<sub>2</sub>CO<sub>3</sub> (0.035 g) by the calcination at 800 °C for 20 h, 800 °C for 40 h, and 900 °C for 20 h of conditions under N<sub>2</sub> stream. The yields of NbC were 72.9, 86.5, and 100% on the calcination conditions of 800 °C\_20 h, 800 °C\_40 h, and 900 °C\_20 h, respectively, which were estimated by RIR analyses.

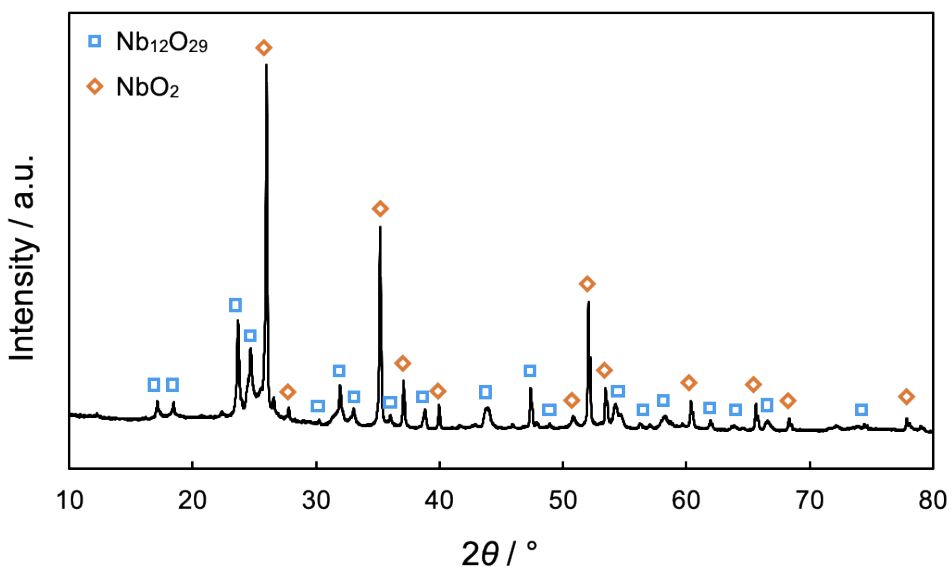

**Figure S9** XRD patterns of obtained products synthesized from the mixture of Nb<sub>2</sub>O<sub>5</sub> (0.1 g), MPC-150 (0.1 g) without K<sub>2</sub>CO<sub>3</sub> by the calcination at 900 °C for 20 h under N<sub>2</sub> stream.

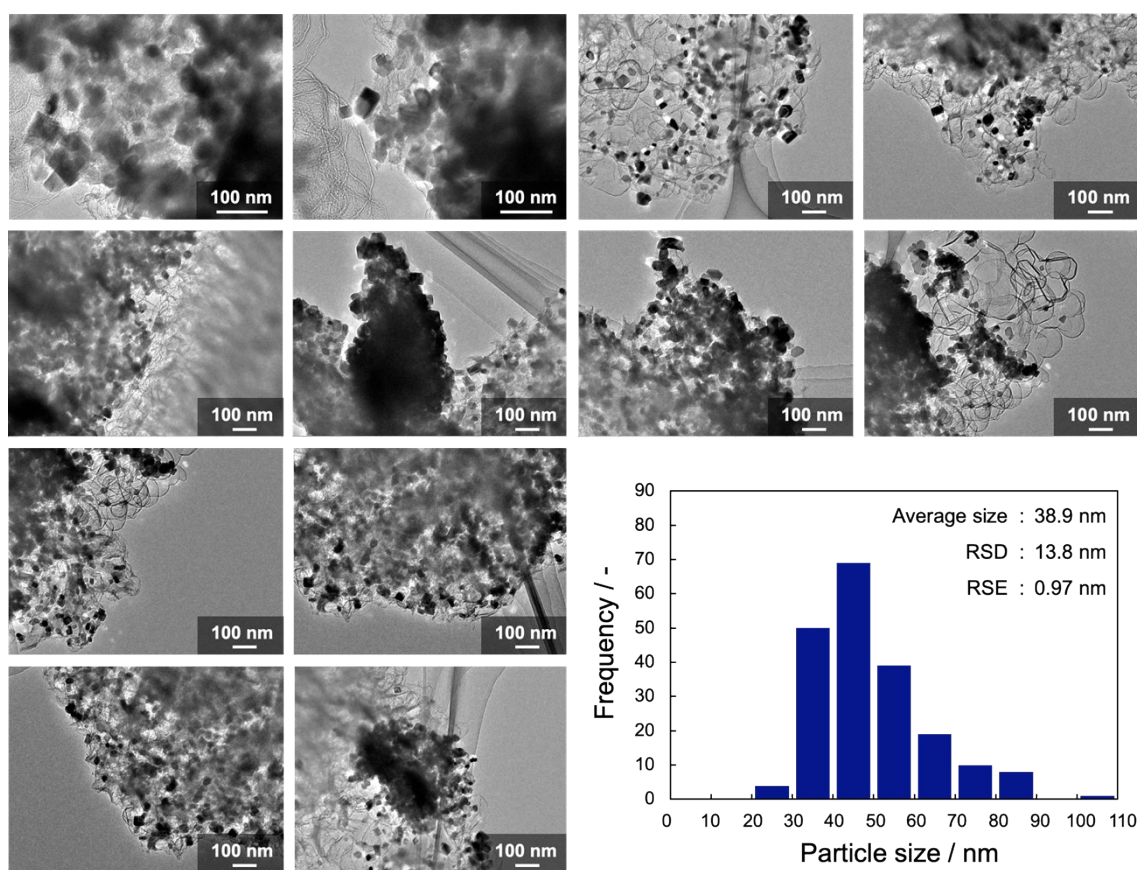

**Figure S10** TEM images of NbC nanoparticles synthesized by using MPC-150. The reactants ( $\text{Nb}_2\text{O}_5$ ,  $\text{K}_2\text{CO}_3$ , and MPC-150) on the Pt boat were mixed and calcined at 1000 °C for 10 h under  $\text{N}_2$  flow condition and size distribution of the obtained NbC nanoparticles. The distribution was estimated by measuring particle sizes of 200 of NbC nanoparticles from TEM images. The terms RSD and RSE indicate “relative standard deviation” and “relative standard error”, respectively.

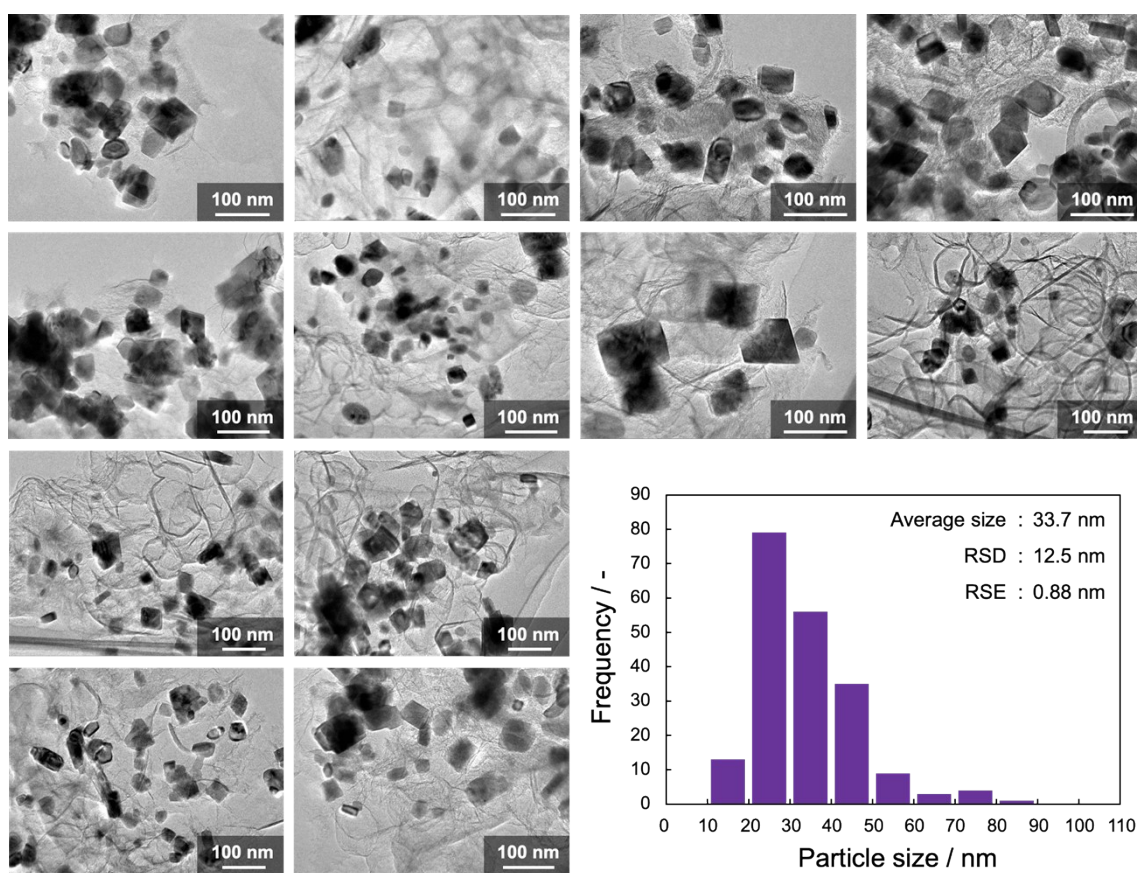

**Figure S11** TEM images of NbC nanoparticles synthesized by using MPC-150. The reactants ( $\text{Nb}_2\text{O}_5$ ,  $\text{K}_2\text{CO}_3$ , and MPC-150) on the Pt boat were mixed and calcined at 900 °C for 20 h under  $\text{N}_2$  flow condition, and size distribution of the obtained NbC nanoparticles. The distribution was estimated by measuring particle sizes of 200 of NbC nanoparticles from TEM images. The terms RSD and RSE indicate “relative standard deviation” and “relative standard error”, respectively.



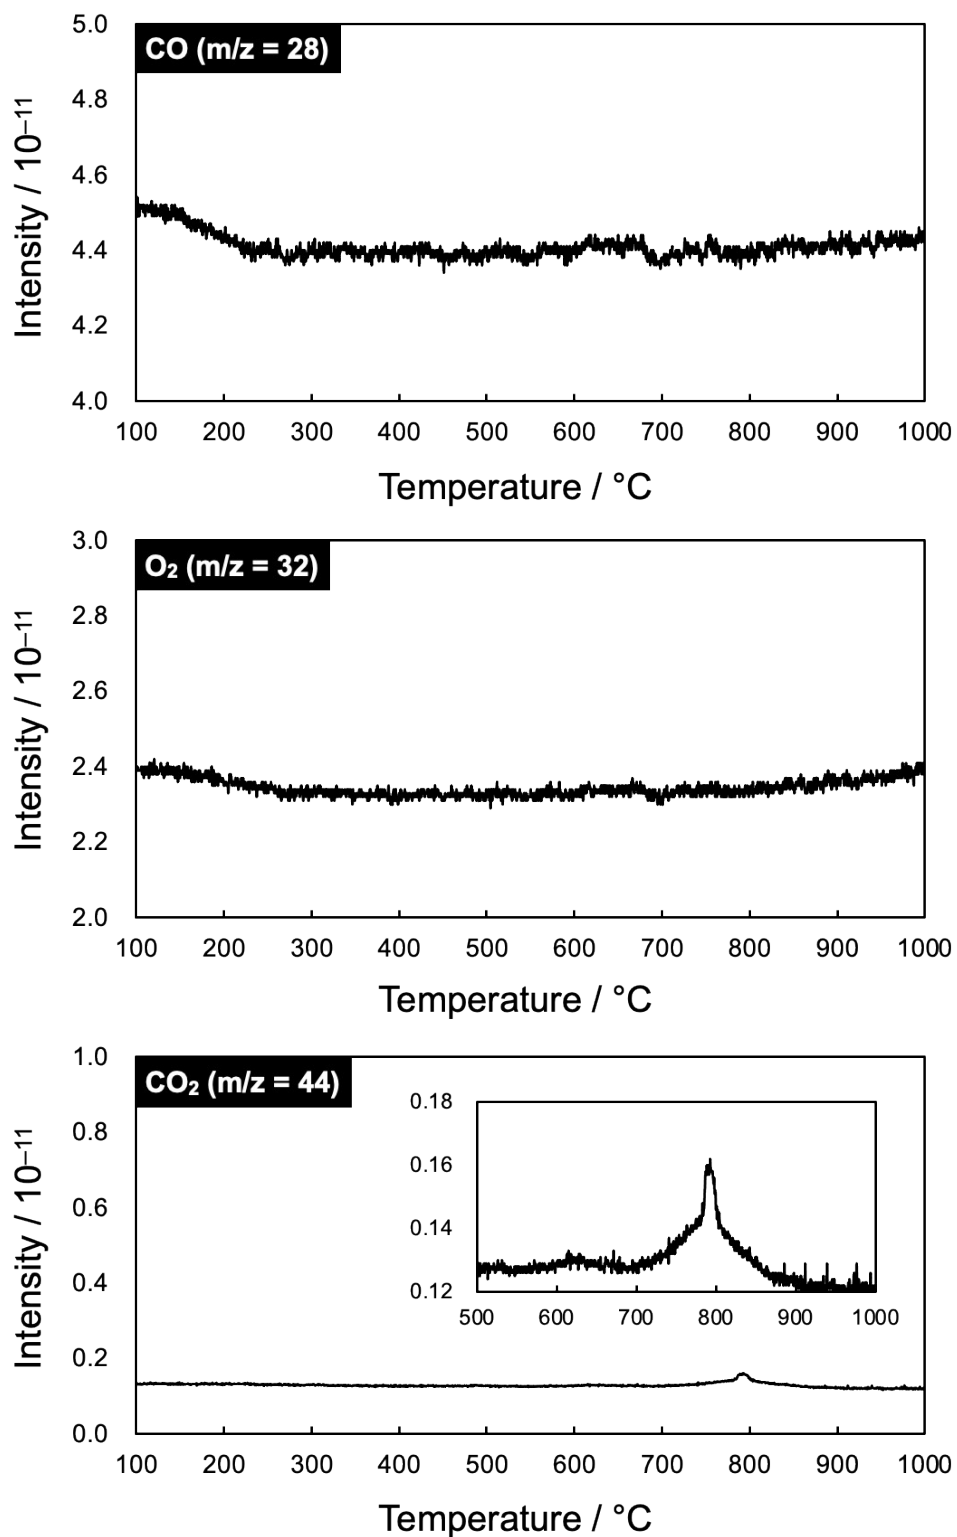

**Figure S12** MS charts of CO ( $m/z = 28$ ), O<sub>2</sub> ( $m/z = 32$ ), and CO<sub>2</sub> ( $m/z = 44$ ) on the heating the mixture of Nb<sub>2</sub>O<sub>5</sub> (0.1 g) and K<sub>2</sub>CO<sub>3</sub> (0.035 g) under the inert Ar atmosphere.

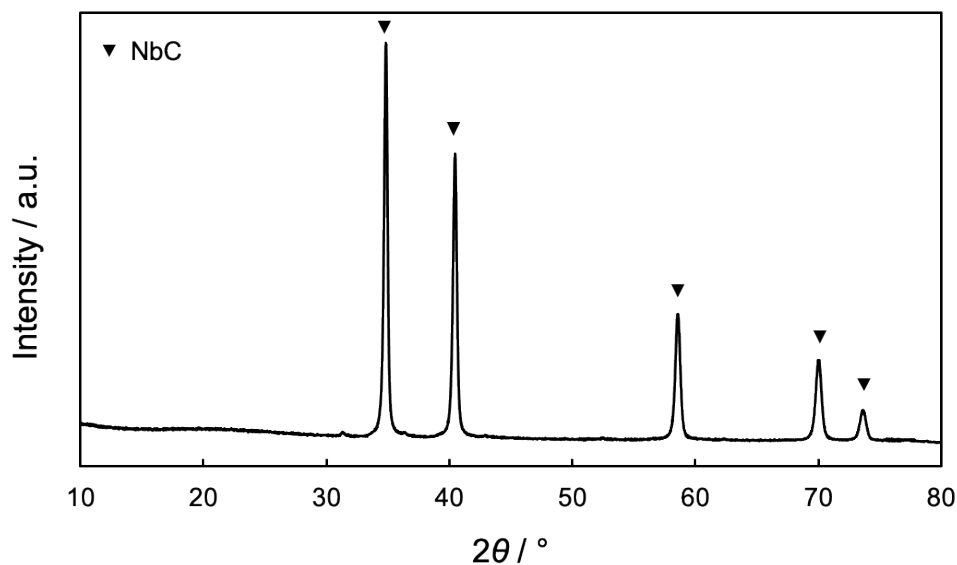

**Figure S13** XRD patterns of synthesized NbC by the calcination of the mixture of  $\text{KNbO}_3$  (0.14 g) and MPC-150 (0.1 g) at 1150 °C for 10 h under  $\text{N}_2$  stream.

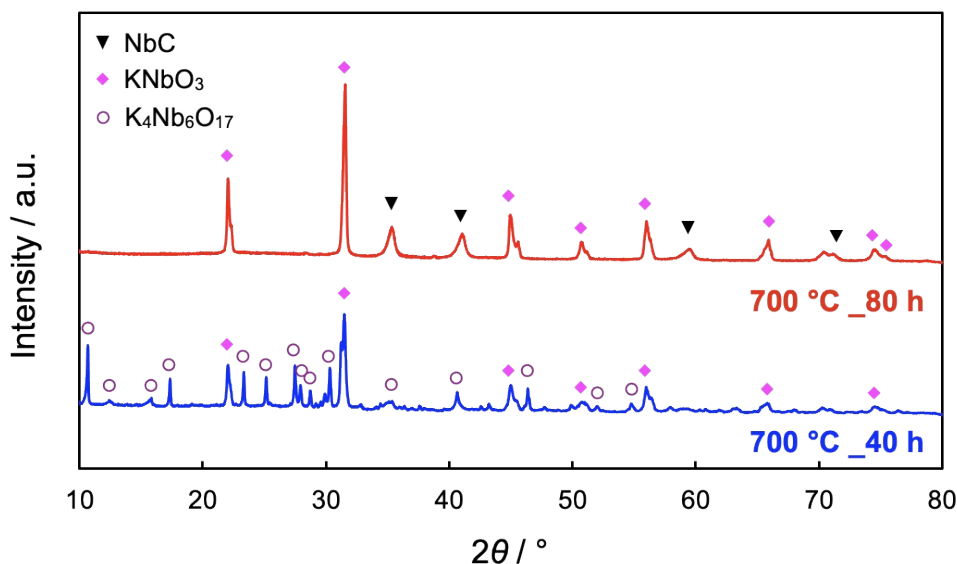

**Figure S14** XRD patterns of resulting products by the calcination of the mixture of  $\text{Nb}_2\text{O}_5$  (0.1 g) and MPC-150 (0.1 g), and KOH (0.042 g) at 700 °C for 40 h or 80 h under  $\text{N}_2$  stream. The yield of NbC was estimated to be 27.7 % on the calcination condition of 700 °C\_80 h by RIR analysis.
